# Supplementary material for: Genetic identification and hybridization in the seagrass genus Halophila (Hydrocharitaceae) in Sri Lankan waters
Source: PeerJ. 2020 Sep 30;8:e10027. doi: 10.7717/peerj.10027 (PMC7532775; doi:10.7717/peerj.10027)
Supplement: Supplemental Information 3 [file peerj-08-10027-s006.xlsx]

## Sheet: 工作表1
sample No	Group	LL	LW	VN	DE	LW:LL	HLW/DE	VA	HLW
MTR1	1	27.8	12.7	16	0.600507	0.456835	10.5744	60.4167	6.35
MTR2	1	25.9	11.525	17	0.615713	0.444981	9.35906	72.3167	5.7625
MTR3	1	25	12.05	15	0.625507	0.482	9.63219	71.8567	6.025
MTR4	1	19.8	10.65	13	0.590735	0.537879	9.01419	73.275	5.325
MTR6	1	31	13.7	16	0.570333	0.441935	12.0105	59.3333	6.85
MTR8	1	20.7	11.6	13	0.62109	0.560386	9.33842	65.955	5.8
MTR9	1	23.5	10.5	12	0.53098	0.446809	9.88738	62.55	5.25
MTR10	1	25.9	13.7	11	0.69968	0.528958	9.79019	63.3733	6.85
MTR11	1	22.92	11.85	11	0.599175	0.517016	9.8886	65.945	5.925
MTR13	1	26.3	13.3	14	0.579153	0.505703	11.4823	69.4633	6.65
MTR16	1	26.4	13.75	14	0.7166	0.520833	9.59392	65.99	6.875
MTR18	1	28	12.68	12	0.499667	0.452857	12.6885	78	6.34
MTR20	1	23.4	12.876	13	0.5965	0.550256	10.793	71.5	6.438
MA8	1	24	9.6	15	0.39349	0.4	12.1985	56.8667	4.8
MA12	1	11.494	6.046	15	0.33132	0.526014	9.12411	79.76	3.023
MA15	1	8.045	4.715	14	0.2851	0.586078	8.26903	67.56	2.3575
MA16	1	20.249	8.4175	15	0.44994	0.4157	9.35402	63.075	4.20875
MA17	1	14.33	7.766	18	0.32346	0.54194	12.0046	70.38	3.883
MA18	1	25.83	12.348	14	0.378267	0.478049	16.3218	58.32	6.174
MA19	1	31.127	14.6333	15	0.66462	0.470117	11.0088	58.4567	7.31667
MA21	1	24.112	9.98381	12	0.52858	0.41406	9.44399	65.3	4.9919
MA24	1	14.474	8.254	14	0.45337	0.570264	9.10294	66.78	4.127
MA27	1	18.044	9.868	13	0.433205	0.546885	11.3895	65.965	4.934
SB1	2	4.69922	1.15168	3	0.09157	0.245079	6.28852	47	0.57584
SB2	2	4.74818	1.64386	4	0.16592	0.346208	4.95377	46	0.82193
SB3	2	4.41504	1.32597	3	0.10948	0.30033	6.05576	51	0.662985
SB4	2	5.32186	1.89184	3	0.09428	0.355485	10.0331	46.07	0.94592
SB5	2	6.21331	1.80195	4	0.13636	0.290015	6.60733	48	0.900975
SB21	3	29.2	12.0667	27	0.54092	0.413242	11.1538	58.1367	6.03333
SB22	3	33	14.1333	25	0.53318	0.428283	13.2538	60.1233	7.06667
SB23	3	30.4	10.0333	21	0.487333	0.330044	10.2941	62.3733	5.01667
SB24	3	23.8	8.6	18	0.389943	0.361345	11.0272	56.56	4.3
SB9	3	18	8.093	16	0.512	0.449611	7.90332	62	4.0465
SB11	3	21	9.702	14	0.4295	0.462	11.2945	58	4.851
SB12	3	16	7.409	11	0.4335	0.463062	8.54556	62	3.7045
SB14	3	20	6.5455	15	0.3375	0.327275	9.69704	61.5	3.27275
SB25	3	20	9.8985	12	0.3825	0.494925	12.9392	68.5	4.94925
SB29	3	12	7.102	17	0.405	0.591833	8.7679	82	3.551
MA1	4	24.575	3.7895	10	0.387713	0.154201	4.88699	59.29	1.89475
MA2	4	17.745	3.4875	9	0.303375	0.196534	5.74784	66.54	1.74375
MA3	4	28.862	3.33733	11	0.316737	0.115631	5.26831	58.8067	1.66867
MA4	4	23.802	2.7475	8	0.236935	0.115431	5.798	62.345	1.37375
MA5	4	24.524	3.603	9	0.28956	0.146917	6.22151	57.5833	1.8015
MA6	4	40.356	3.819	15	0.300398	0.0946328	6.35658	57.935	1.9095
MA7	4	27.745	2.787	8	0.264363	0.100451	5.27115	60.7867	1.3935
MA20	4	28.538	3.89333	11	0.381577	0.136426	5.10164	56.8467	1.94667
SB16	5	16	6.893	13	0.328	0.430812	10.5076	61	3.4465
SB15	5	11	3.902	?	0.289	0.354727	6.75087	54	1.951
